# Supplementary material for: Copper complexes of the functionalised tripodal ligand tris(2-pyridyl)methylamine and its derivatives †
Source: Royal Society of Chemistry journal article supplement (doi:10.1039/b008476j), 2001-01-01
Supplement: b008476j.doc [file b008476j.doc]

**SUPPLEMENTARY INFORMATION**

**B008476J**

**Copper complexes of the functionalised tripodal ligand 1,1,1-tris(2-pyridyl)methylamine and its derivatives**

**Phillip J. Arnold,***a* **Sian C. Davies,***b* **Jonathan R. Dilworth,***c* **Marcus C. Durrant,***b****,** D. Vaughan Griffiths,***a* **David L. Hughes,***b* **Raymond L. Richards***d***and Philip C. Sharpe***a*

*aDepartment of Chemistry, Queen Mary and Westfield College, Mile End Road, London, UK E1 4NS*

*bDepartment of Biological Chemistry, John Innes Centre, Colney Lane, Norwich, UK NR4 7UH*

*cInorganic Chemistry Laboratory, South Parks Road, Oxford, UK OX1 3QR*

*dSchool of Chemistry, Physics and Environmental Science, University of Sussex, Brighton, UK BN1 9QJ*

**Preparations**

**Tris(2-pyridyl)methylacetamide, tpma.** MeCOCl (0.7 cm3, 9.8 mmol) was added to an ice-cold solution of tpm (0.5 g, 1.9 mmol) in dry dichloromethane (50 cm3) and the solution was stirred for 2.5 h, then poured into water (50 cm3). The organic layer was separated off and discarded. The aqueous phase was rendered alkaline with aqueous K2CO3 and extracted with dichloromethane. The extract was dried over Na2SO4, and the solvent was removed *in vacuo* to give a brown foam, which was recrystallized from acetone/ether as tpma (0.40 g, 69%. Found: C, 71.0; H, 5.2; N, 18.5. Calc. for C18H16N4O: C, 71.0; H, 5.3; N, 18.4%). MP 1530C. 1H NMR (CD2Cl2): 9.24 (s, 1H, N*H*), 8.48 (m, 3H, H6), 7.63 (m, 3H, H4), 7.51 (m, 3H, H3), 7.17 (m, 3H, H5), 2.11 (s, 3H, CH3). 13C{1H} NMR (CD2Cl2): 168.7 (CO), 161.5 (C2), 147.9 (C6), 136.1 (C4), 124.8 (C3), 122.3 (C5), 71.0 (*C*NHCO), 24.3 (*C*H3). IR: 3275m (NH), 1668s (amide I), 1587m and 1568m (py ring), 999m, 787m, 768m, 748m, 662m, 621m and 557m cm-1.

**N-{[1,1-bis(pyrid-2-yl)-1-(quinol-2-yl)]methyl}acetamide, bpqa.** Ac2O (0.65 g, 6.4 mmol) was added to 1,1-bis(pyrid-2-yl)-1-(quino-2-yl)methylamine (0.2 g, 0.64 mmol) and the mixture stirred for 30 min. Water (10 ml) was then added and the solution stirred for 30 min. CHCl3 (25 ml) was added and the mixture basified with saturated aqueous NaHCO3. The layers were separated and the CHCl3 layer washed with saturated aqueous NaHCO3 and water. The organic layer was dried over MgSO4 and reduced to dryness *in vacuo* to give an off-white solid, which was recrystallised from acetone/Et2O as bpqa (0.19 g, 78%. Found: C, 74.3; H, 4.9; N, 15.7. Calc. For C22H18N4O: C, 74.6; H, 5.1; N, 15.8%). MP 860C. 1HNMR (CDCl3): 9.51 (s, 1H, NH), 8.40 (m, 2H, H6), 7.88-7.98 (m, 2H, H4’/8’), 7.47-7.64 (m, 7H, H 3/4/5'/6'/7'), 7.35-7.40 (m, 1H, H 3'), 7.03 (m, 3H, H5), 2.10 (s, 3H, CH3). 13C{1H} NMR (CDCl3): 168.7 (CO), 160.6 (C2), 160.5 (C2'), 148.0 (C6), 145.8 (C9'), 135.8 (C4), 135.7 (C4'), 129.1 (C7/8), 127.3 (C6'), 127.1 (C10), 126.5 (C3'), 124.5 (C3), 122.2 (C5'), 122.0 (C5), 70.9 (CNH), 24.2 (CH3). IR: 3341 br m (NH), 2947w, 2855w, 2361m, 2341m, 1720m, 1685m (amide CO), 1578m (py ring), 1497m, 1466m, 1427m, 1315m, 1265m, 1153w, 1026w and 799w cm-1.

**Tris(2-pyridyl)methyldodecanamide, tpml.** A solution of lauroyl chloride (1.0 cm3, 4.3 mmol) in dichloromethane (20 cm3) was added dropwise to an ice-cold solution of tpm (0.8 g, 3.1 mmol) in dichloromethane (80 cm3) over 30 min. The mixture was stirred for 1 h, then anhydrous K2CO3 (1 g) was added, and the mixture was stirred for a further 2 h, then poured into a solution of K2CO3 (8 g) in water (40 cm3). The organic layer was separated and combined with a single dichloromethane extract of the aqueous phase, then dried over Na2SO4. The solution was filtered and concentrated *in vacuo*, and the resulting foam was extracted with hexane. The hexane solution was concentrated to *ca.* 10 cm3 and kept at -100C overnight; the precipitate was filtered off and dried as tpml (0.76 g, 56%. Found: C, 75.7; H, 8.3; N, 12.6. Calc. for C28H36N4O: C, 75.6; H, 8.2; N, 12.6%). MP 480C. 1H NMR (CD2Cl2): 9.22 (s, 1H, NH), 8.47 (m, 3H, H6), 7.62 (m, 3H, H4), 7.51 (m, 3H, H3), 7.16 (m, 3H, H5), 2.34 (t, *J*HH = 7.5 Hz, 2H, CH2CO), 1.60 (m, 4H, C*H*2C*H2*CH2CO), 1.26 (m, 14H, CH2), 0.88 (t, *J*HH = 6.7 Hz, 3H, CH3). 13C{1H} NMR (CD2Cl2): 171.7 (CO), 161.7 (C2), 147.9 (C6), 136.1 (C4), 124.9 (C3), 122.3 (C5), 70.9 (*C*NHCO), 37.6, 32.3, 30.0 (2C), 29.9, 29.8, 29.7, 29.6, 26.0, 23.1 (all CH2), 14.2 (CH3). IR: 3292m (NH), 1661s (amide I), 1587m and 1568w (py ring), 1055m, 991m, 773m, 746m, 662m, 619m and 573m cm-1.

**4-Oxo-4-[tris-(2-pyridyl)methylamino]butanoic acid, tpmsH, 4-Oxo-4-{[1-(6-methoxypyrid-2-yl)-1,1-bis(pyrid-2-yl)]methylamino}butanoic acid, mops, and 4-oxo-4-{[1,1-bis(6-methoxypyrid-2-yl)-1-(pyrid-2-yl)]methylamino}-butanoic acid, bops.** A solution of tpm (0.5 g, 1.9 mmol) and succinic anhydride (0.2 g, 2.0 mmol) in dichloromethane (30 cm3) was stirred at room temperature overnight, then concentrated to dryness *in vacuo*. The residue was recrystallized from acetone as tpmsH (0.56 g, 80%. Found: C, 66.0; H, 4.9; N, 15.4. Calc. for C20H18N4O3: C, 66.3; H, 5.0; N, 15.5%). MP (recrystallized from dichloromethane) 1900C. 1H NMR (DMSO-d6): 12.1 (br s, 1H, CO2H), 9.24 (s, 1H, NH), 8.45 (m, 3H, H6), 7.66 (m, 3H, H4), 7.42 (m, 3H, H3), 7.22 (m, 3H, H5), 2.56 (t, *J*HH = 6.3 Hz, CH2), 2.40 (t, *J*HH = 6.4 Hz, CH2). 13C NMR (DMSO-d6): 174.0 (s, CO2H), 169.6 (s, CONH), 161.0, (s, C2), 147.4 (d, *J*CH = 179 Hz, C6), 135.9 (d, *J*CH = 164 Hz, C4), 124.2 (d, *J*CH = 167 Hz, C3), 122.0 (d, *J*CH = 164 Hz, C5), 50.5 (s, *C*NHCO), 30.8 (t, *J*CH = 129 Hz, *C*H2CO2H), 29.0 (t, *J*CH = 128 Hz, *C*H2CONH). IR: 3234m (NH), 1732s and 1720s (CO2H), 1630s (amide I), 1589m and 1568w (py ring), 1169s, 826m, 789m, 772m, 743m, 652m, 621m and 559m cm-1.

A similar procedure using mop in place of tpm gave mops in 95% yield as a hygroscopic foam (Found: M+H, 393.1551. Calc. For C21H21N4O4: M+H, 393.1563). 1H NMR (CDCl3): 9.38 (1H, s, NH), 8.49 (m, 2H, H6), 7.65 (m, 2H, H4), 7.53 (m, 1H, H4’), 7.50 (m, 2H, H3), 7.19 (m, 1H, H3’), 7.16 (m, 2H, H5), 6.59 (m, 1H, H5’), 3.75 (s, 3H, CH3), 2.72 - 2.75 (m, 2H, CH2), 2.64 - 2.67 (m, 2H, CH2). 13C{1H} NMR (CDCl3): 176.2 (CO2H), 170.7 (CO), 162.4 (C2), 160.9 (C6'), 156.9 (C2'), 147.6 (C6), 139.3 (C4'), 135.8 (C4), 125.0 (C5), 122.2 (C3), 116.0 (C5'), 109.0 (C3'), 70.5 (CNH), 53.2 (CH3), 31.4 (CH2), 29.5 (CH2). IR: 3333br,m (NH), 3055w, 2928w, 2858w, 1720m (CO2), 1678 (amide CO), 1589m and 1576m (py ring), 1497m, 1465m, 1431m, 1311w, 1265m, 1157w, 1026m, 995w, 779w and 736m cm-1.

Likewise, use of bop gave, after recrystallization from CH2Cl2, bops in 89% yield. (Found: M+H, 423.1668. Calc. for C22H23N4O5: M+H, 423.1680). 1H NMR (CDCl3): 9.76 (br s, 1H, CO2H), 9.12 (s, 1H, NH), 8.43 (m, 1H, H6), 7.53 (m, 1H, H4), 7.44 (m, 1H, H3), 7.42 (m, 2H, H4’), 7.08 (m, 1H, H5), 7.02 (m, 2H, H3’), 6.50 (m, 2H, H5’), 3.69 (s, 3H, CH3), 2.63 - 2.67 (m, 2H, CH2), 2.54 - 2.57 (m, 2H, CH2). 13C{1H} NMR (CDCl3): 176.6 (CO2H), 170.4 (CO), 162.3 (C6'), 161.2 (C2), 157.4 (C2'), 147.5 (C6), 138.4 (C4'), 135.6 (C4), 125.3 (C3), 122.1 (C5), 116.3 (C3'), 108.8 (C5'), 70.7 (CNH), 53.2 (OCH3), 31.2 (CH2), 29.3 (CH2). IR: 3361 br, m (NH), 2947m, 1724m (CO2), 1682m (amide CO), 1578m and 1565m (py ring), 1497m, 1466s, 1427m, 1312m, 1265m, 1153w, 1026m, 991w, 799m, 768m and 748w cm-1.

**2-{[Tris(2-pyridyl)methylamino]carbamoyl}benzene-1-sulfonic acid, tpmbH.** A solution of tpm (0.5 g, 1.9 mmol) and technical grade *o*-sulfobenzoic anhydride (0.37 g, 2 mmol) in dichloromethane (75 cm3) was stirred overnight, then reduced in volume to *ca.* 10 cm3 and kept at -100C. The precipitate was filtered off as tpmbH (0.55 g, 64%. Found: C, 59.8; H, 4.3; N, 12.1. Calc. for C23H18N4O4S·H2O: C, 59.5; H, 4.3; N, 12.1). MP 2800C (loses solvent of crystallization at *ca.* 1500C). 1H NMR (DMSO-d6): 11.24 (s, 1H, exchanges slowly with D2O, NH), 8.67 (m, 3H, H6), 8.08 (m, 6H, H4+C6H4), 7.93 (m, 1H, C6H4), 7.59 (m, 3H, H3), 7.45 (m, 3H, H5). 13C NMR (DMSO-d6): 167.9 (s, CO), 158.3 (s, C2), 145.6 (d, *J*CH = 185 Hz, C6), 143.7 (s, CSO3H), 141.0 (d, *J*CH = 168 Hz, C4), 132.5 (s, *C*CO), 130.4, 130.0, 129.8, 126.8 (all d, *J*CH = 163 Hz, C6H4), 124.2 (d, *J*CH = 170 Hz, C3), 124.0 (d, *J*CH = 169 Hz, C5), 67.3 (s, CNH). IR: 3483br,m, 1661s (amide I), 1622m, 1589m and 1572w (C6H4 and py rings), 1300s, 1238s and 1190s (SO3H), 1082m, 1018m, 754s, 675m, 617s and 567m cm-1.

***N-*[1-Phenylmethylidene]-*N*-tris(2-pyridyl)methylamine, tpmSB.** A solution of benzaldehyde (1.0 cm3, 9.8 mmol) and tpm (0.5 g, 2.0 mmol) in ethanol (30 cm3) was boiled under reflux for 5 h, then concentrated *in vacuo*. The precipitate was filtered off and recrystallized from hexane as tpmSB (0.14 g, 21%. Found: C, 78.5; H, 5.1; N, 16.0. Calc. for C23H18N4: C, 78.8; H, 5.2; N, 16.0%). MP 1460C. 1H NMR (CD2Cl2): 8.53 (m, 3H, H6), 8.15 (s, 1H, CHN), 7.85 (m, 2H, C6H5), 7.67 (m, 3H, H4), 7.56 (m, 3H, H3), 7.44 (m, 3H, C6H5), 7.18 (m, 3H, H5). 13C NMR (CD2Cl2): 164.2 (s, C2), 163.9 (d, *J*CH = 161 Hz, CH=N), 148.8 (d, *J*CH = 182 Hz, C6), 137.3 (s, *C*CHN), 136.2 (d, *J*CH = 162 Hz, C4), 131.2 (d, *J*CH = 161 Hz, C6H5), 128.9 (d, *J*CH = 157 Hz, C6H5), 128.7 (d, *J*CH = 156 Hz, C6H5), 125.1 (d, *J*CH = 166 Hz, C5), 122.1 (d, *J*CH = 163 Hz, C3), 81.7 (s, *C*N). IR: 1642m (C=N), 1584m and 1566w (py ring), 1150w, 994m, 789m, 776m, 749m, 687m, 664m, 619m and 567m cm-1.

UV (MeCN): 257 ( 24800).
